# Supplementary material for: Discovery of co-occurring driver pathways in cancer
Source: PubMed Central journal article supplement (PMC4133618; doi:10.1186/1471-2105-15-271), 2014-08-09
Supplement: 12859_2014_6533_MOESM1_ESM.pdf [file 12859_2014_6533_MOESM1_ESM.pdf]

## Additional Files

### Additional file 1 — The results by applying mod\_CoMDP to the ovarian carcinoma dataset

*Table S1 - The gene sets co-occurrent with TP53 identified by applying mod\_CoMDP to the ovarian carcinoma dataset*

| r  | Gene set                                                                                   | <i>p</i> | <i>n</i> | <i>ra</i> | <i>pr</i> |
|----|--------------------------------------------------------------------------------------------|----------|----------|-----------|-----------|
| 3  | <i>MYC, CCNE1, NINJ2</i>                                                                   | < 0.0001 | 155      | 0.4397    | 0.0430    |
| 4  | <i>MYC, CCNE1, NINJ2, MG<sub>5</sub></i>                                                   | 0.0060   | 169      | 0.4894    | 0.0280    |
| 5  | <i>MYC, CCNE1, NINJ2, ZNF596, USH2A</i>                                                    | 0.0020   | 183      | 0.5228    | 0.0190    |
| 6  | <i>MYC, CCNE1, NINJ2, ZNF596, USH2A, BRD4</i>                                              | 0.0240   | 197      | 0.5610    | 0.0340    |
| 7  | <i>MYC, CCNE1, NINJ2, ZNF596, USH2A, BRD4, HMCN1</i>                                       | 0.0220   | 206      | 0.5868    | 0.0060    |
| 8  | <i>MYC, CCNE1, NINJ2, ZNF596, USH2A, NF1, HMCN1, TPD52L2</i>                               | 0.0020   | 211      | 0.6098    | 0.0040    |
| 9  | <i>MYC, CCNE1, NINJ2, ZNF596, USH2A, NF1, HMCN1, TPD52L2, TRIT1</i>                        | < 0.0001 | 221      | 0.6276    | 0.0010    |
| 10 | <i>MYC, CCNE1, NINJ2, MG<sub>5</sub>, USH2A, NF1, HMCN1, ZNF596, USP35, MG<sub>6</sub></i> | 0.0310   | 226      | 0.6563    | 0.0010    |

Here *p* and *pr* denote the *p*-values of the significance of the detected gene set and its co-occurrence significance with *TP53* respectively, *n* denotes the gene set's overage, and *ra* denotes its co-occurrence ratio with *TP53*. *MG<sub>5</sub>* is a metagene including four genes: *STMN3, SLC2A4RG, ZGPAT, RTEL1*.
